# Supplementary material for: Functional Tradeoffs Underpin Salinity-Driven Divergence in Microbial Community Composition
Source: PubMed Central journal article supplement (PMC3937345; doi:10.1371/journal.pone.0089549), 2014-02-27

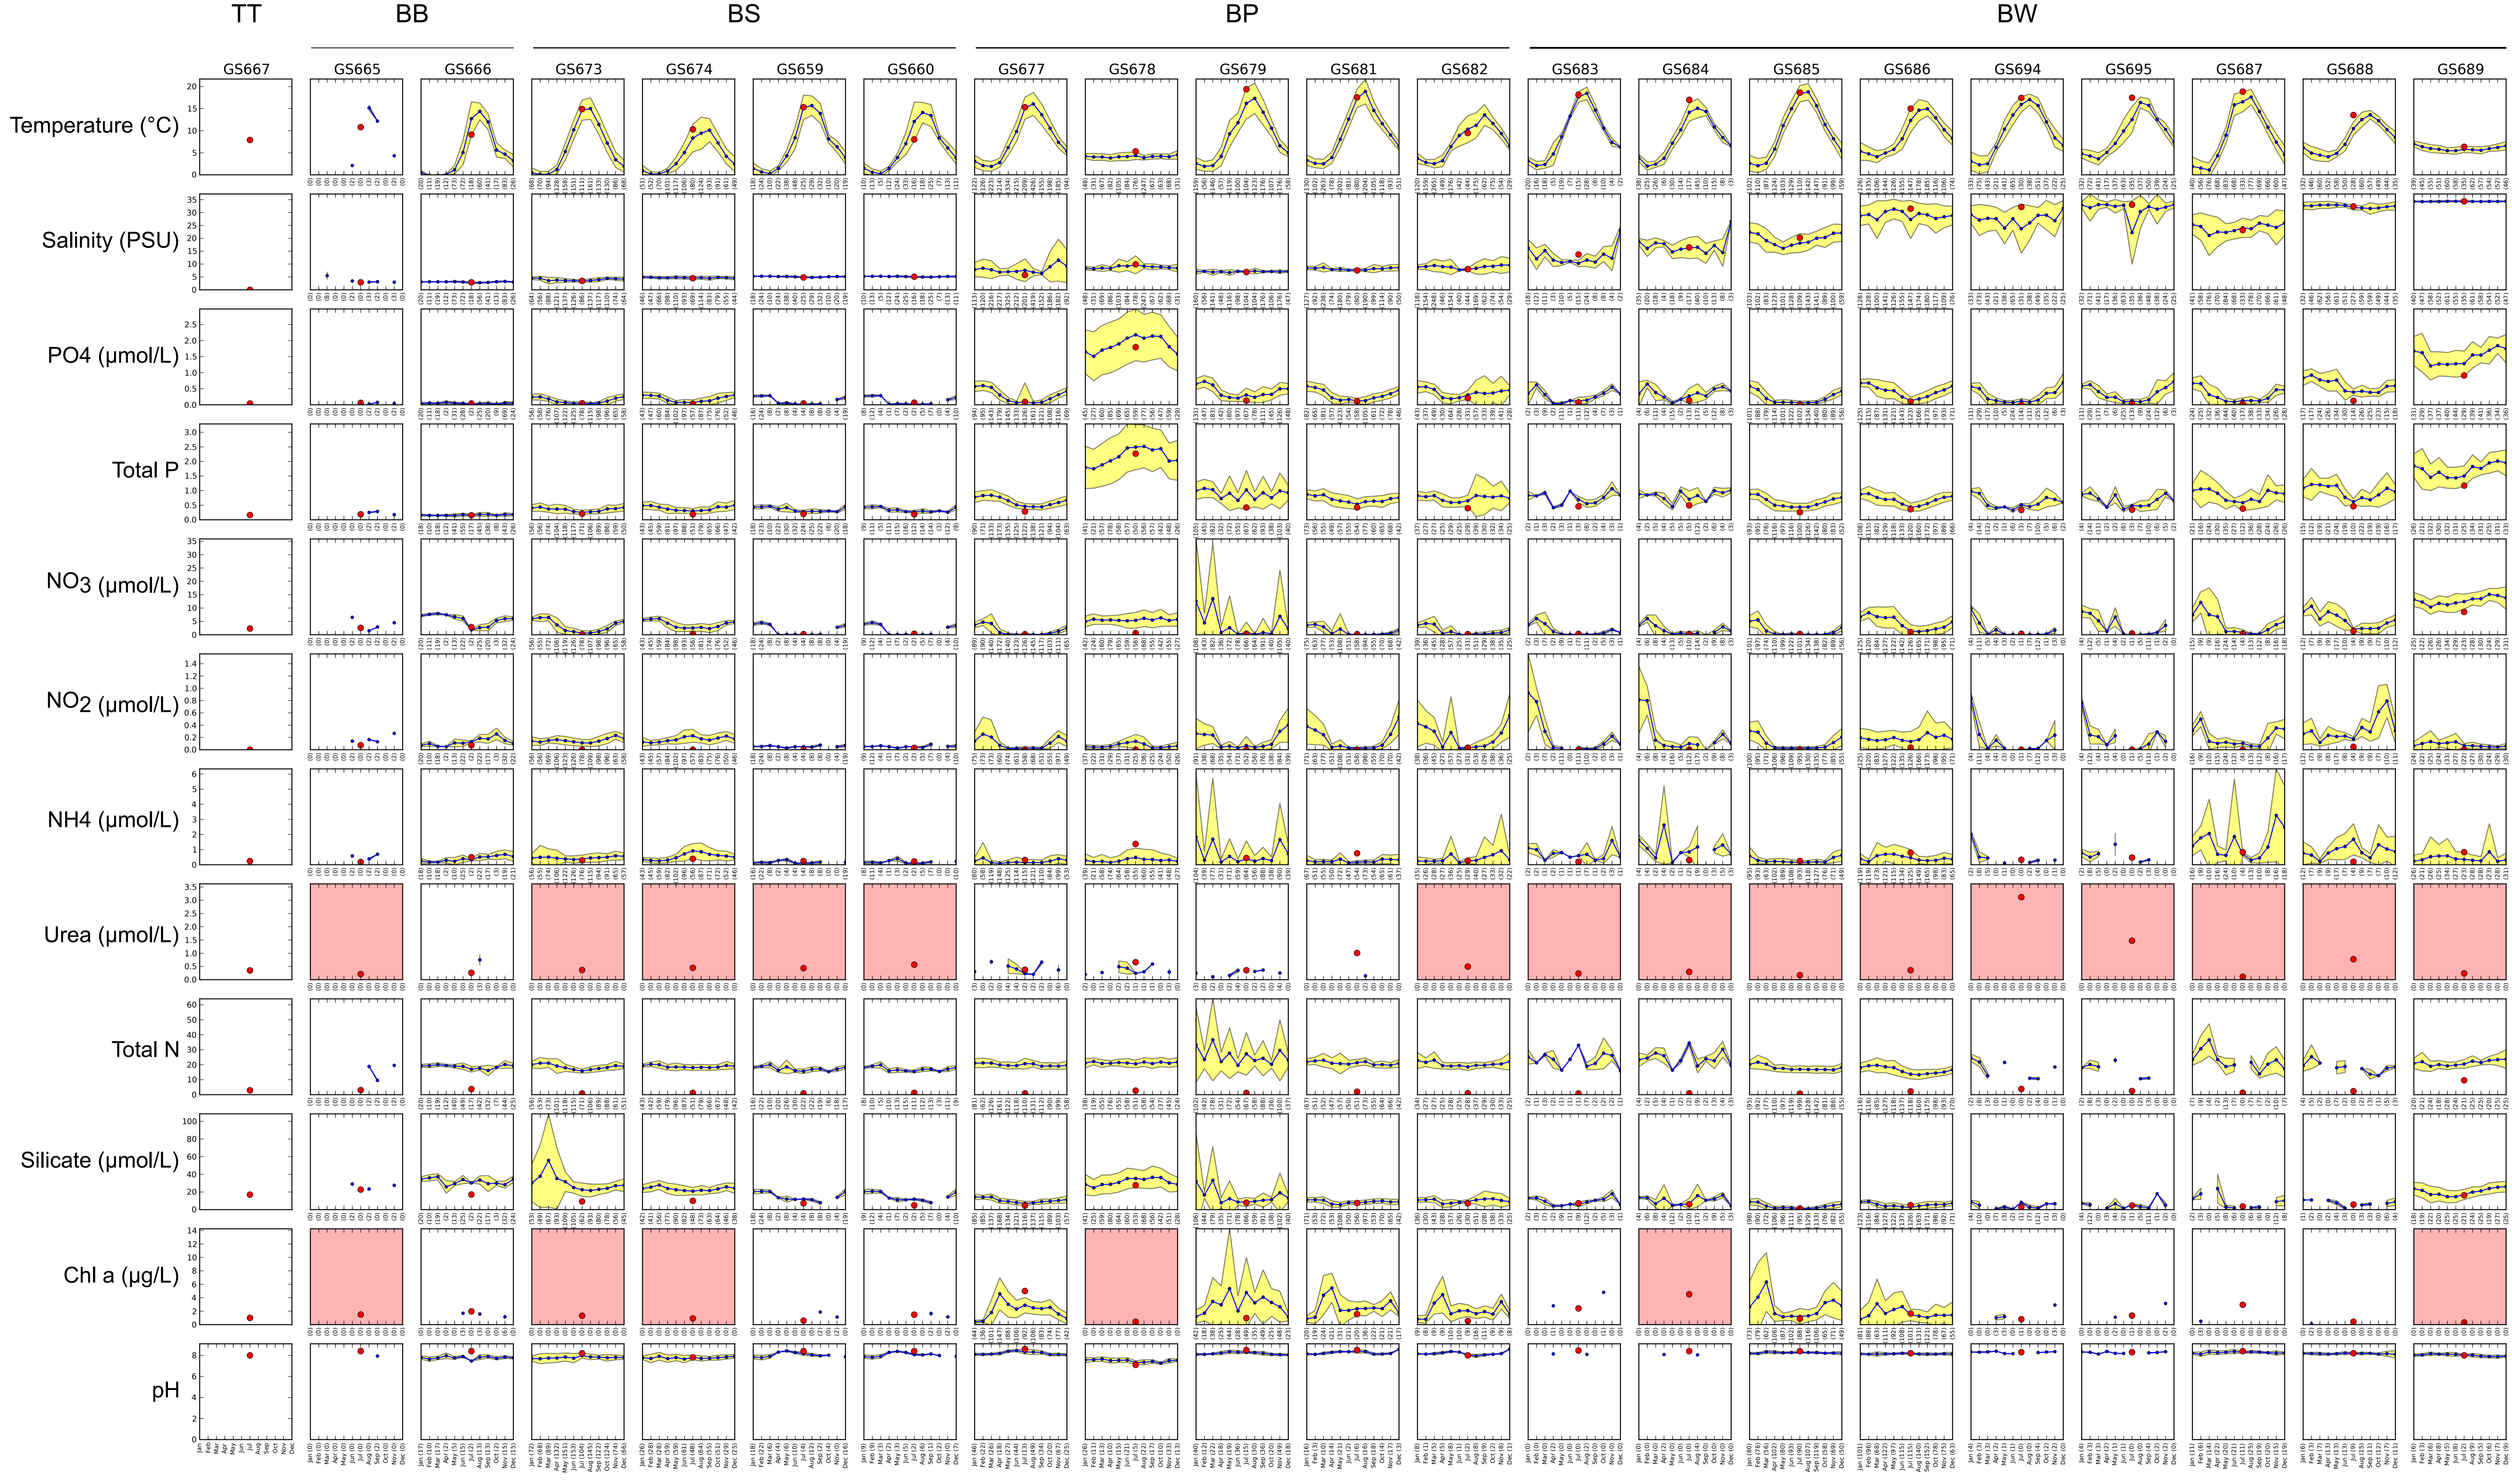

Supplement: pone.0089549.s001.pdf [file pone.0089549.s001.pdf]
