# Supplementary material for: Functional Tradeoffs Underpin Salinity-Driven Divergence in Microbial Community Composition
Source: PubMed Central journal article supplement (PMC3937345; doi:10.1371/journal.pone.0089549), 2014-02-27

Dimension 2

1.0

0.5

0.0

-0.5

-1.0

Actinobacteria

Alphaproteobacteria

Bacteroidetes

Betaproteobacteria

Firmicutes

Cyanobacteria

Deltaproteobacteria

Epsilonproteobacteria

Gammaproteobacteria

Verrucomicrobia

Other

? unclassified

\* uncultured

-1.0

-0.5

0.0

0.5

1.0

Dimension 1

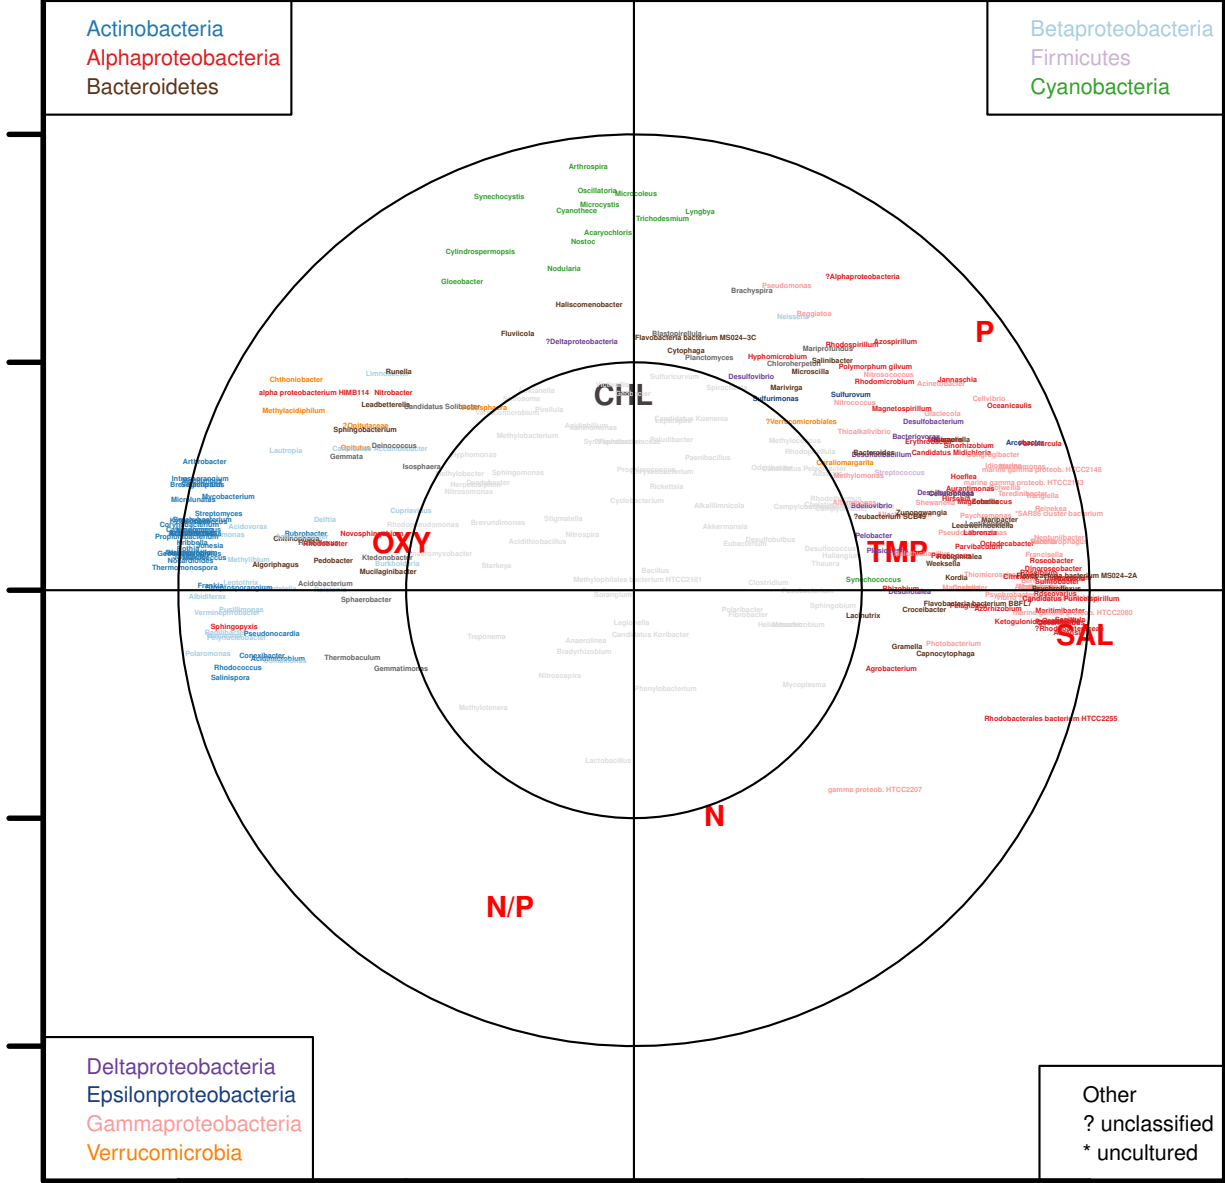

Supplement: pone.0089549.s005.pdf [file pone.0089549.s005.pdf]
