# Supplementary material for: Functional Tradeoffs Underpin Salinity-Driven Divergence in Microbial Community Composition
Source: PubMed Central journal article supplement (PMC3937345; doi:10.1371/journal.pone.0089549), 2014-02-27
Supplement: pone.0089549.s007.pdf [file pone.0089549.s007.pdf]

## Low salinity

### EMP glycolysis

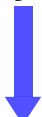

2-acetyl CoA

**Non-MVA** isoprenoid  
biosynthesis

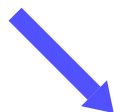

isopentenyl-PP

menaquinone  
biosynthesis

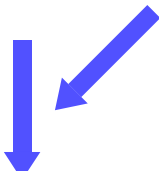

**MQ** **MQ-H2**

NDH

NADH

NAD<sup>+</sup>

complex I

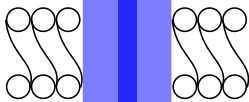

**4 H<sup>+</sup>**

## High salinity

### ED glycolysis

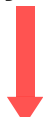

pyruvate and G-3-P

**MVA** isoprenoid  
biosynthesis

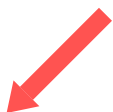

ubiquinone  
biosynthesis

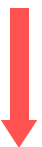

**UQ** **UQ-H2**

NQR

NADH

NAD<sup>+</sup>

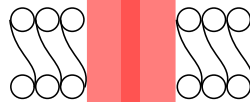

**4 Na<sup>+</sup>**
