# Supplementary material for: Functional Tradeoffs Underpin Salinity-Driven Divergence in Microbial Community Composition
Source: PubMed Central journal article supplement (PMC3937345; doi:10.1371/journal.pone.0089549), 2014-02-27

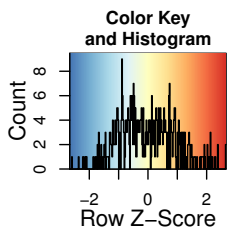

TT BB BS BP BW BP

GS667 GS665 GS666 GS673 GS674 GS659 GS660 GS677 GS679 GS681 GS682 GS683 GS684 GS685 GS686 GS694 GS695 GS687 GS688 GS689 GS678

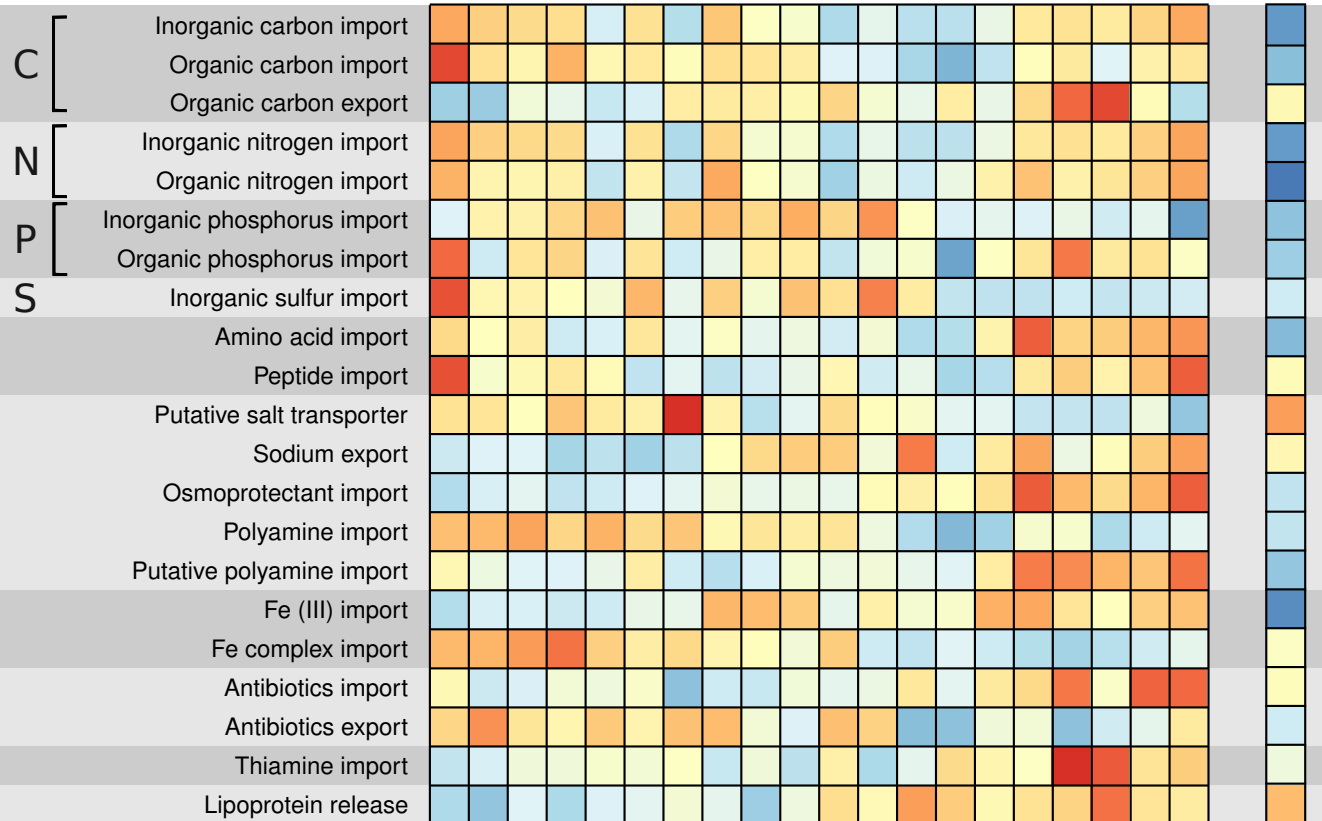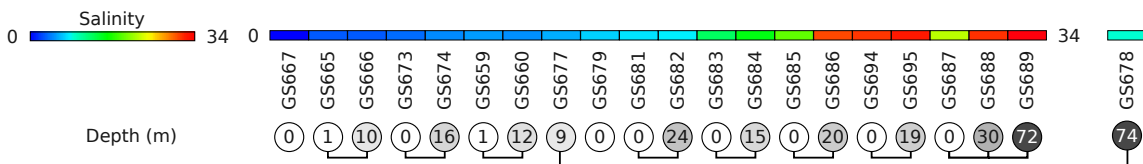

Supplement: pone.0089549.s008.pdf [file pone.0089549.s008.pdf]
