# Supplementary material for: Functional Tradeoffs Underpin Salinity-Driven Divergence in Microbial Community Composition
Source: PubMed Central journal article supplement (PMC3937345; doi:10.1371/journal.pone.0089549), 2014-02-27
Supplement: pone.0089549.s009.pdf [file pone.0089549.s009.pdf]

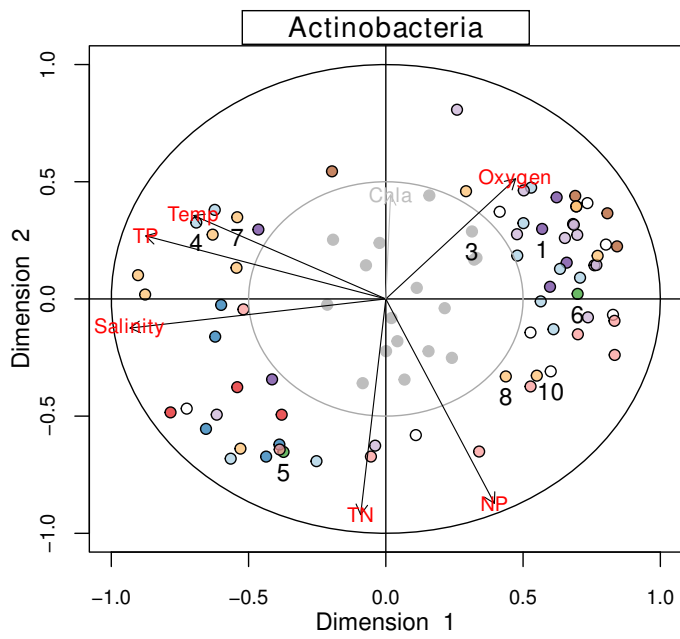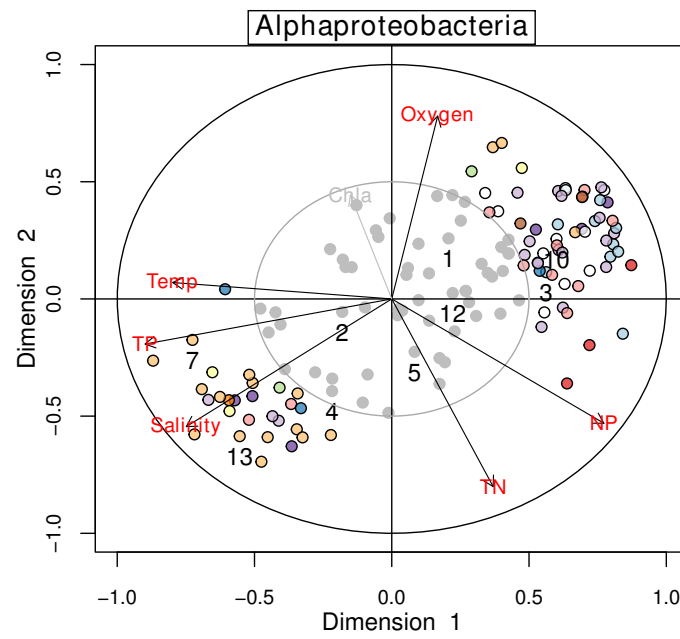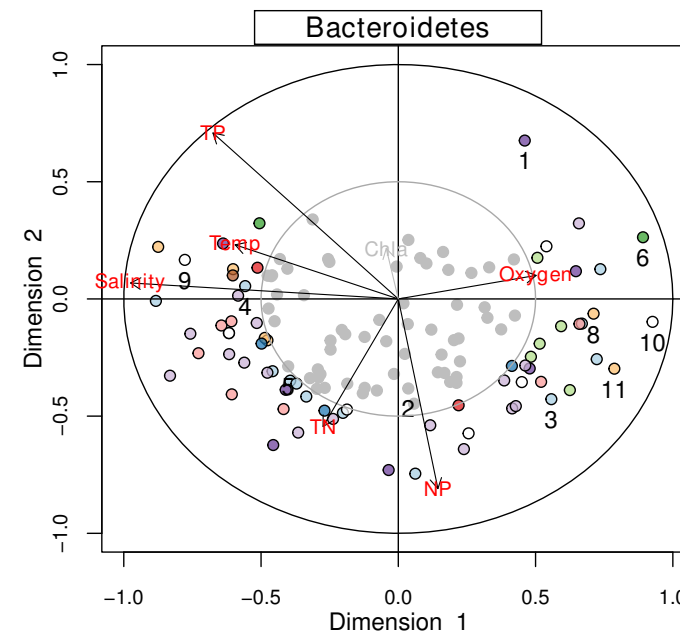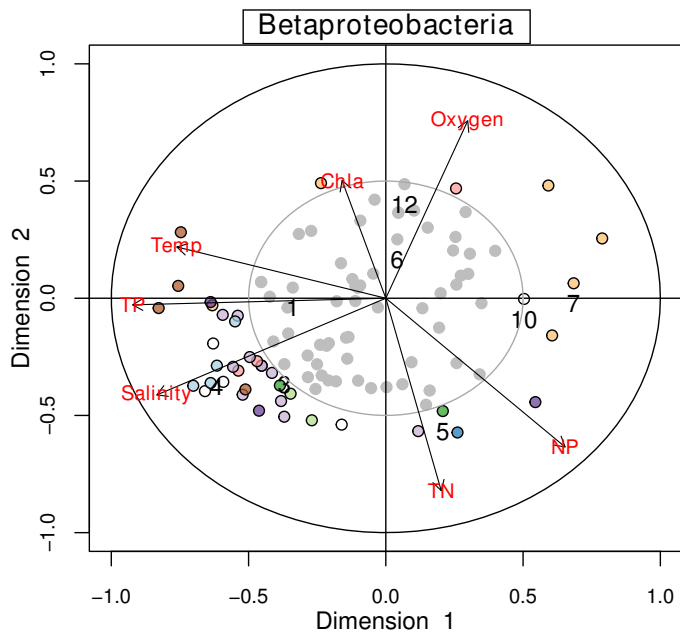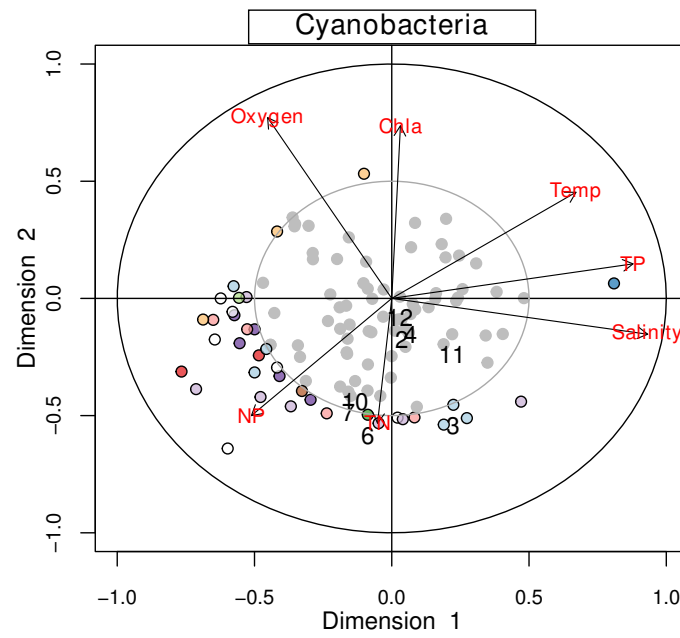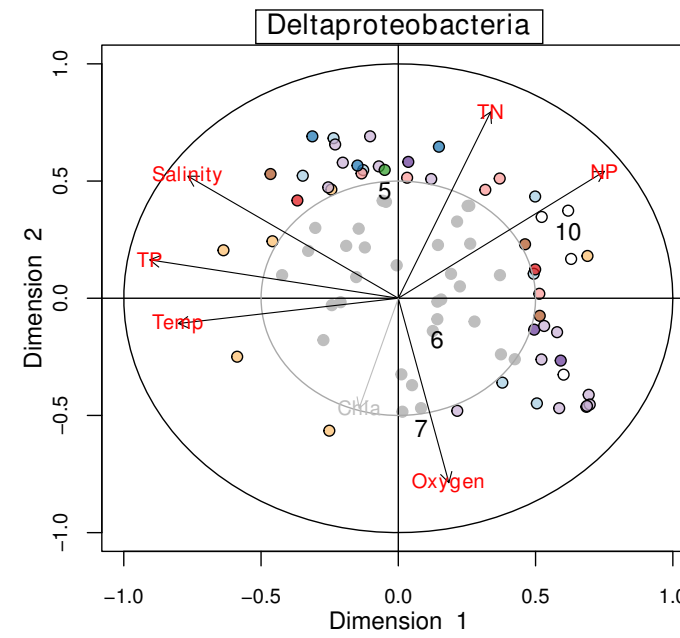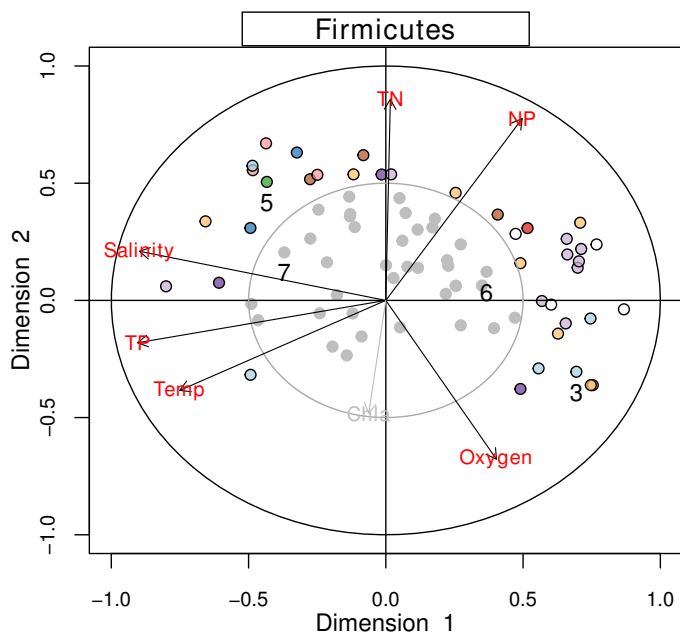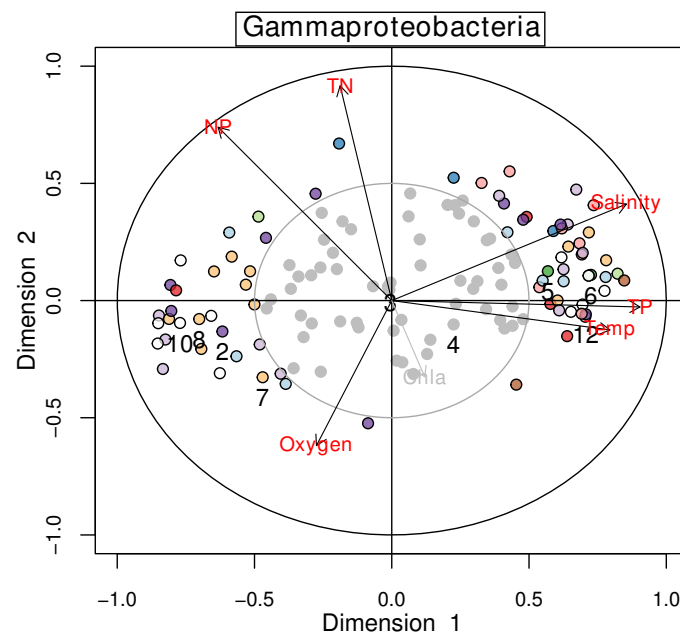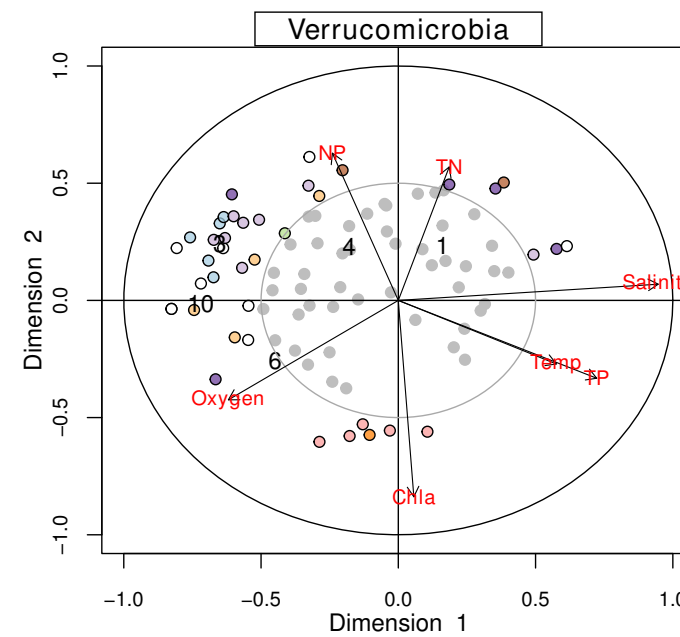

### KEGG Metabolic Category

- Central carbohydrate metabolism
- Fatty acid metabolism
- Lipid metabolism
- Terpenoid biosynthesis
- Polyamine
- Nucleotide metabolism
- Transport
- Two-component regulatory system
- Amino acid metabolism
- Cofactor and vitamin biosynthesis
- Carbon fixation
- Methane metabolism
- Other

### KEGG Module

- 1 = Ubiquinone biosynthesis ●
- 2 = Menaquinone biosynthesis ●
- 3 = Glycolysis (EMP) ○
- 4 = Glycolysis (ED) ○
- 5 = Isoprenoid biosynthesis (Mev) ●
- 6 = Isoprenoid biosynthesis (Non-Mev) ●
- 7 = Fe<sup>3+</sup> transport ●
- 8 = Fe-complex transport ●
- 9 = NQR dehydrogenase (Na<sup>+</sup>) ○
- 10 = NDH dehydrogenase (H<sup>+</sup>) ○
- 11 = Competence related transporter ○
- 12 = Glutathione biosynthesis ●
- 13 = Glycine betaine transport ●
