# Supplementary material for: Functional Tradeoffs Underpin Salinity-Driven Divergence in Microbial Community Composition
Source: PLoS One. 2014 Feb 27;9(2):e89549. doi: 10.1371/journal.pone.0089549 (PMC3937345; doi:10.1371/journal.pone.0089549)
Supplement: Table S3 — Bacterial genome size estimates for samples. (XLS) [file pone.0089549.s013.xls]

## Sheet: Sheet1
Table S3. Bacterial genome size estimates for samples
Sample	Filter	Genome Equivalents (Additive)	Std Error	Bacterial Peptides	Bacterial Peptides/Genome	Genome Size Estimate (Mbp)
GS659	0p1	71.5	11.9	116817	1633.8	1.67161
GS660	0p1	114.1	24.6	157912	1383.98	1.38929
GS665	0p1	85.6	18	138894	1622.59	1.65894
GS666	0p1	57.8	12.9	86133	1490.19	1.50931
GS667	0p1	62.6	15	95732	1529.27	1.55347
GS673	0p1	146.6	27.9	228403	1558	1.58595
GS674	0p1	70.6	12	99572	1410.37	1.41911
GS677	0p1	82.6	14	125072	1514.19	1.53644
GS678	0p1	52.1	8.8	126494	2427.91	2.56903
GS679	0p1	66	11.1	101231	1533.8	1.5586
GS681	0p1	53.3	8.9	82733	1552.21	1.57941
GS682	0p1	61.9	10.6	99807	1612.39	1.64741
GS683	0p1	56.9	11	100493	1766.13	1.82116
GS684	0p1	34.3	7.9	67263	1961.02	2.0414
GS685	0p1	70.9	12.8	124807	1760.32	1.81459
GS686	0p1	24.1	10.1	47255	1960.79	2.04114
GS687	0p1	54.2	8.8	96769	1785.41	1.84294
GS688	0p1	55.3	10.6	97671	1766.2	1.82124
GS689	0p1	49.7	10.3	89143	1793.62	1.85222
GS694	0p1	24.5	7.1	52853	2157.27	2.26318
GS695	0p1	60.4	18.1	124730	2065.07	2.15898
GS659	0p8	64.1	11.9	132914	2073.54	2.16856
GS660	0p8	46.3	9.1	88235	1905.72	1.97891
GS665	0p8	35.6	7	69018	1938.71	2.01618
GS666	0p8	67.2	13.3	155588	2315.3	2.44177
GS667	0p8	57.3	14.1	62793	1095.86	1.06369
GS673	0p8	112.6	17.4	214436	1904.4	1.97742
GS674	0p8	28.1	7.5	66937	2382.1	2.51726
GS677	0p8	47.1	8.5	108578	2305.27	2.43043
GS678	0p8	74.3	14.8	209866	2824.58	3.0173
GS679	0p8	140.4	19.3	287907	2050.62	2.14266
GS681	0p8	49	9.1	113842	2323.31	2.45082
GS682	0p8	56	9.6	138093	2465.95	2.61202
GS683	0p8	11.3	4.3	43581	3856.73	4.18374
GS684	0p8	64.8	11.7	154102	2378.12	2.51276
GS685	0p8	72	13.1	176375	2449.65	2.5936
GS686	0p8	23.6	6.8	61751	2616.57	2.78223
GS687	0p8	28.3	6.4	75957	2683.99	2.85843
GS688	0p8	30	6	81426	2714.2	2.89257
GS689	0p8	32.2	6.1	89533	2780.53	2.96753
GS694	0p8	29.2	5.9	61709	2113.32	2.21352
GS695	0p8	24.1	6.5	62836	2607.3	2.77176
GS659	3p0	17.2	5.5	31424	1826.98	1.88992
GS660	3p0	7.2	2.4	17227	2392.64	2.52917
GS665	3p0	7.5	3.4	13072	1742.93	1.79494
GS666	3p0	15.9	4.3	35427	2228.11	2.34324
GS667	3p0	10	3.9	22429	2242.9	2.35995
GS673	3p0	7	2.2	14172	2024.57	2.11322
GS674	3p0	14.8	4.5	31712	2142.7	2.24672
GS677	3p0	13.7	4.1	36856	2690.22	2.86547
GS678	3p0	40.1	8.1	115340	2876.31	3.07577
GS679	3p0	16.2	4.6	40083	2474.26	2.62141
GS681	3p0	16.6	5.3	48018	2892.65	3.09423
GS682	3p0	3.9	1.9	9616	2465.64	2.61167
GS683	3p0	11.2	3.7	31378	2801.61	2.99135
GS684	3p0	3.8	2	14234	3745.79	4.05837
GS685	3p0	2.9	1.9	11809	4072.07	4.4271
GS686	3p0	8.6	2.8	21216	2466.98	2.61318
GS687	3p0	3.8	2	9639	2536.58	2.69184
GS688	3p0	19.1	5	55329	2896.81	3.09893
GS689	3p0	10	4.4	30828	3082.8	3.30912
GS694	3p0	10.6	3.7	24128	2276.23	2.39761
GS695	3p0	15.6	3.8	41431	2655.83	2.82661
